# Supplementary material
Source: publisher figshare collection journal article supplement (https://acs.figshare.com/ndownloader/files/4016563)
Supplement: Supplementary file 1 [file 4016563]

# SUPPORTING INFORMATION

## **Molecular Nanoscale Magnetic Refrigerants: A Ferrimagnetic {Cu<sup>II</sup><sub>15</sub>Gd<sup>III</sup><sub>7</sub>} Cage-like Cluster from the Use of Pyridine-2,6-dimethanol**

**Despina Dermitzaki,<sup>†</sup> Giulia Lorusso,<sup>‡</sup> Catherine P. Raptopoulou,<sup>△</sup> Vassilis Psycharis,<sup>△</sup> Albert Escuer,<sup>\*,§</sup> Marco Evangelisti,<sup>\*,‡</sup> Spyros P. Perlepes,<sup>\*,†</sup> and Theocharis C. Stamatatos<sup>\*,#</sup>**

<sup>†</sup> Department of Chemistry, University of Patras, 265 04 Patras, Greece

<sup>‡</sup> Instituto de Ciencia de Materiales de Aragón (ICMA), CSIC-Universidad de Zaragoza, Departamento de Física de la Materia Condensada, 50009 Zaragoza, Spain

<sup>§</sup> Departament de Química Inorganica, Universitat de Barcelona, Diagonal 645, 08028 Barcelona, Spain

<sup>△</sup> Institute of Advanced Materials, Physicochemical Processes, Nanotechnology and Microsystems, Department of Materials Science, NCSR “Demokritos”, 153 10 Aghia Paraskevi Attikis, Greece

<sup>#</sup> Department of Chemistry, Brock University, L2S 3A1 St. Catharines, Ontario, Canada

---

\* To whom correspondence should be addressed: E-mail: [tstamatatos@brocku.ca](mailto:tstamatatos@brocku.ca) (Th.C.S.)

## Experimental Section

**Syntheses.** All manipulations were performed under aerobic conditions using materials (reagent grade) and solvents as received.  $\text{Cu}(\text{O}_2\text{CPh})_2 \cdot 2\text{H}_2\text{O}$  was prepared as a blue microcrystalline solid in high yield (~95%) by the 1:2 reaction of  $\text{CuSO}_4 \cdot 5\text{H}_2\text{O}$  and  $\text{NaO}_2\text{CPh}$  in  $\text{H}_2\text{O}$ .

**$[\text{Cu}_{15}\text{Gd}_7(\text{OH})_6(\text{CO}_3)_4(\text{O}_2\text{CPh})_{19}(\text{pdm})_9(\text{pdmH}_2)_3(\text{H}_2\text{O})_2]$  (1).** To a stirred, pale yellow solution of  $\text{pdmH}_2$  (0.14 g, 1.0 mmol) and  $\text{NEt}_3$  (0.14 mL, 1.0 mmol) in MeCN (30 mL) were added solids  $\text{Gd}(\text{NO}_3)_3 \cdot 6\text{H}_2\text{O}$  (0.45 g, 1.0 mmol) and  $\text{Cu}(\text{O}_2\text{CPh})_2 \cdot 2\text{H}_2\text{O}$  (0.34 g, 1.0 mmol) at the same time. The resulting, blue-colored, suspension was stirred for a further 45 min, filtered, and the filtrate was allowed to slowly evaporate at room temperature. After 10 days, X-ray quality blue crystals of **1**  $4.5\text{MeCN} \cdot 1.5\text{H}_2\text{O}$  were collected by filtration, washed with cold MeCN (2 x 3 mL), and dried under vacuum; the yield was 20%. CCDC deposition number: 952810.

Selected IR data ( $\text{cm}^{-1}$ ) for **1**: 3422 (mb), 3062 (m), 2922 (m), 2842 (w), 1600 (s), 1558 (vs), 1470 (w), 1444 (m), 1398 (vs), 1266 (w), 1160 (m), 1064 (m), 847 (m), 830 (m), 782 (m), 722 (s), 676 (m), 562 (w), 500 (m), 438 (w).

**Table S1.** Bond Valence Sum Calculations<sup>1</sup> for Selected Oxygen Atoms in **1**<sup>a</sup>

|     | BVS  | assignment       | group             |
|-----|------|------------------|-------------------|
| O21 | 1.01 | OH <sup>-</sup>  |                   |
| O22 | 1.23 | OH <sup>-</sup>  |                   |
| O3  | 1.04 | ROH              | pdmH <sub>2</sub> |
| O4  | 1.15 | ROH              | pdmH <sub>2</sub> |
| O1W | 0.26 | H <sub>2</sub> O |                   |

<sup>a</sup> A BVS in the ~1.8-2.0, ~1.0-1.2, and ~0.2-0.4 ranges for an O atom is indicative of non-, single- and double-protonation, respectively, but can be altered somewhat by hydrogen bonding.

<sup>1</sup> Brown, I. D.; Altermatt, D. *Acta Crystallogr. Sect. B* **1985**, 244.

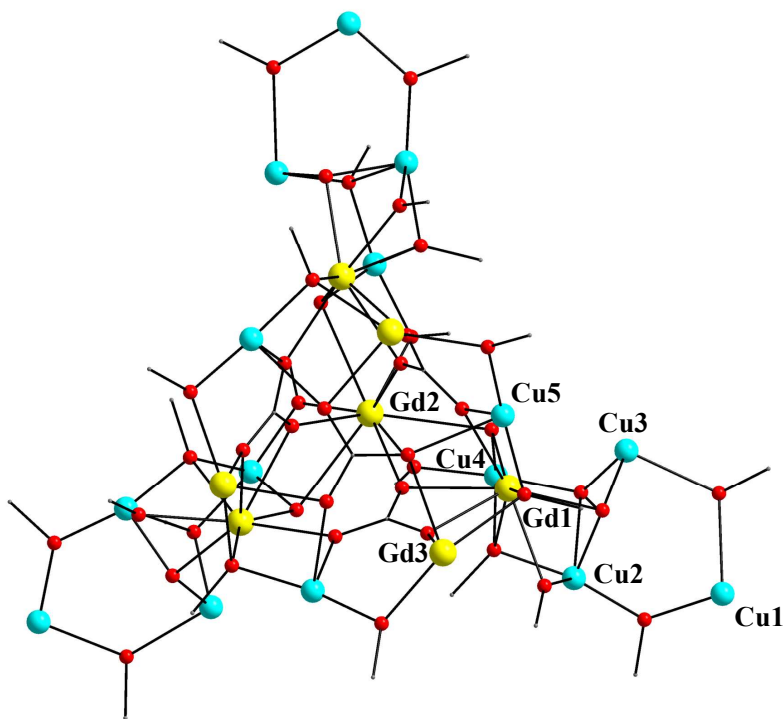

**Figure S1.** The complete  $[\text{Cu}_{15}\text{Gd}_7(\mu_6\text{-CO}_3)(\mu_5\text{-CO}_3)_3(\mu_3\text{-OH})_6(\mu_3\text{-OR})_9(\mu\text{-OR})_{15}]^{13+}$  core of **1**.

Color scheme: Cu<sup>II</sup> cyan, Gd<sup>III</sup> yellow, O red, C gray.

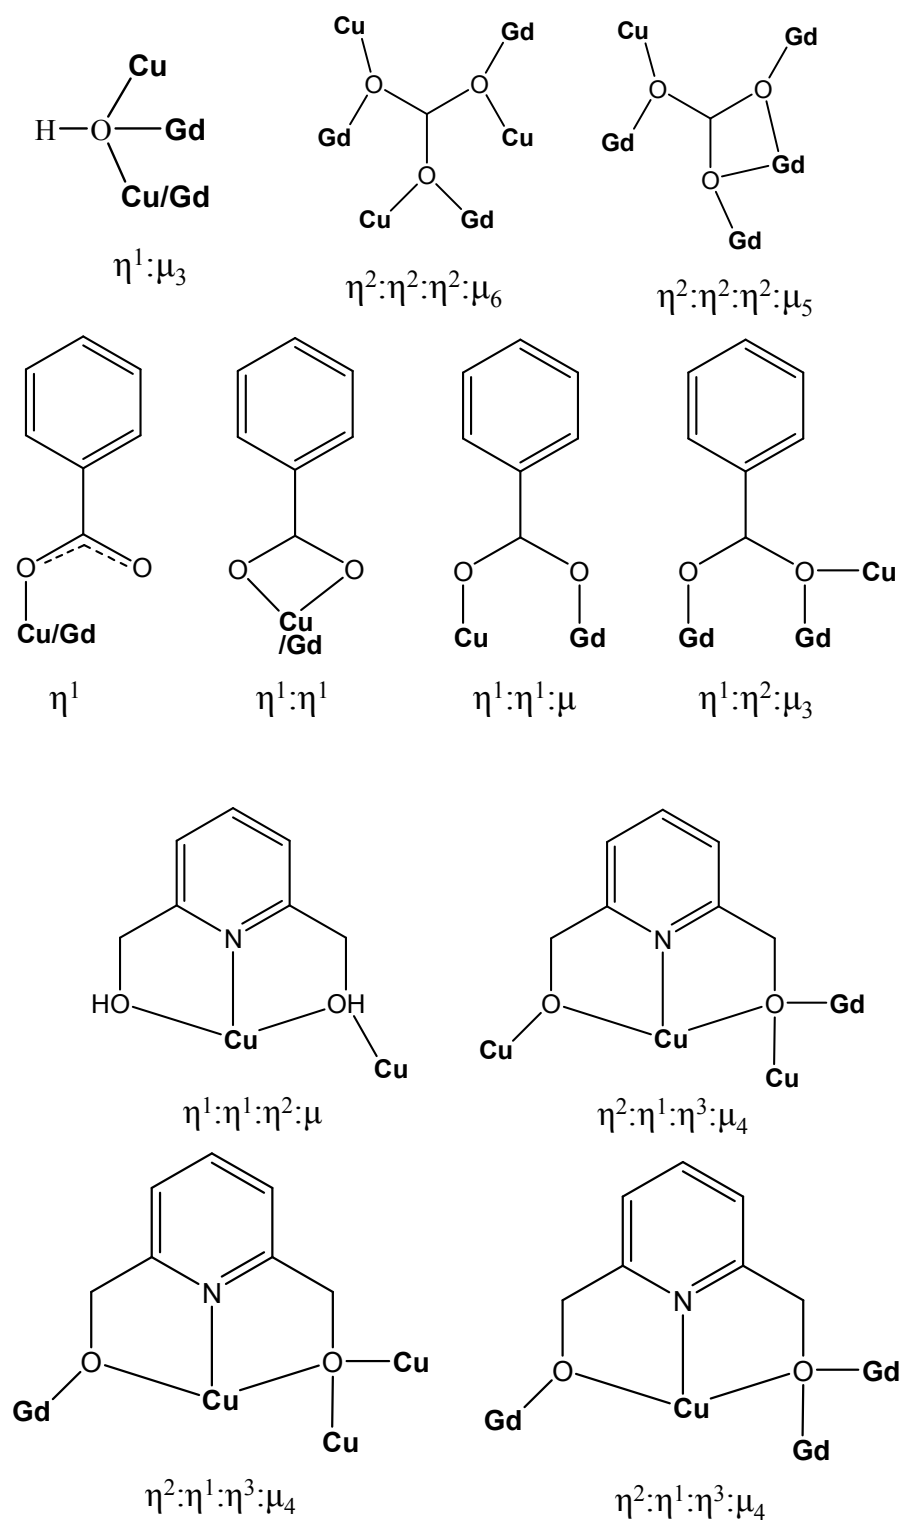

**Figure S2.** The crystallographically established coordination modes of all ligands present in complex 1.

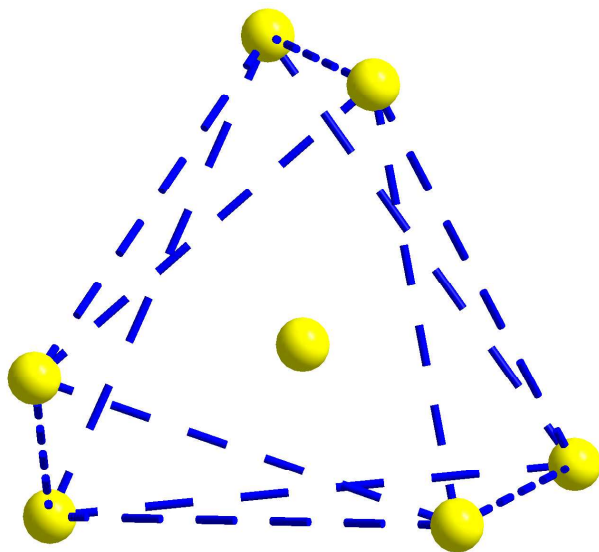

**Figure S3.** The capped triangular antiprismatic topology of the  $\text{Gd}_7$  subunit of **1**; the blue dashed lines indicate the  $\text{Gd}^{3+} \dots \text{Gd}^{3+}$  vectors in the triangular antiprism.

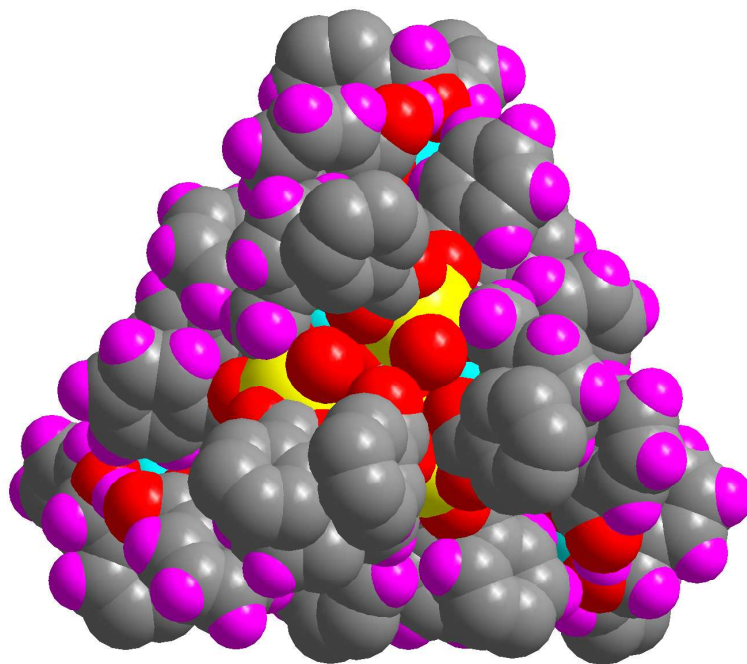

**Figure S4.** Space-filling representation of **1**. Color scheme:  $\text{Cu}^{\text{II}}$  cyan;  $\text{Gd}^{\text{III}}$  yellow, O red, N green, C gray, H purple.

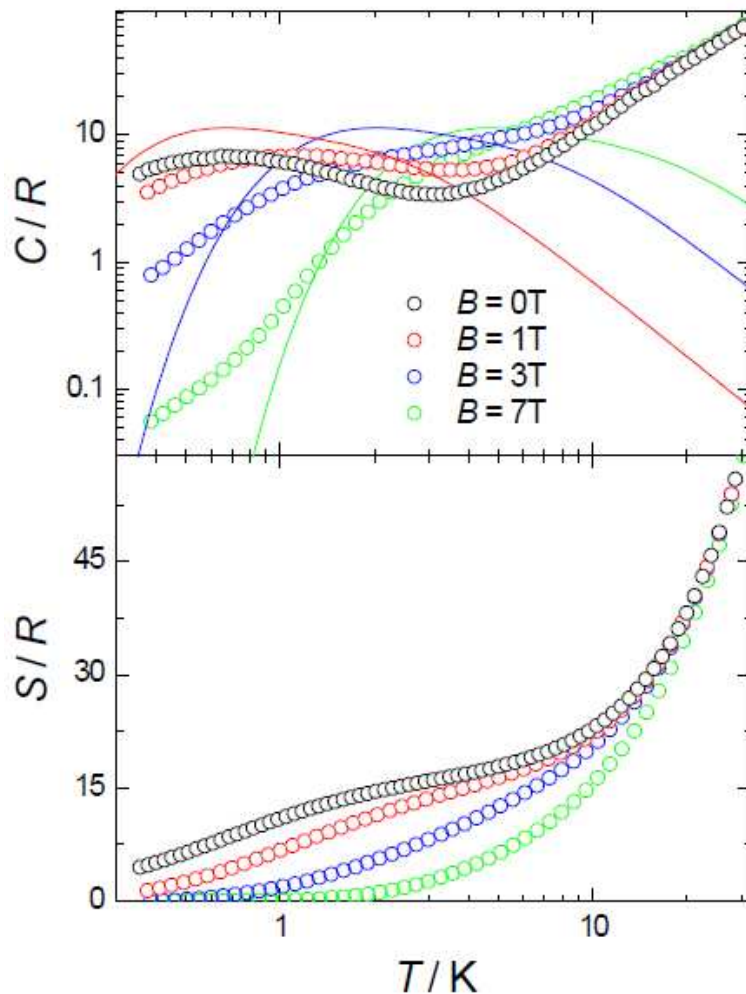

**Figure S5.** (top) Temperature dependencies of the heat capacity ( $C$ ) of **1** normalized to the gas constant  $R$  collected for  $B = 0, 1, 3$ , and  $7$  T. (bottom) Temperature dependencies of the experimental magnetic entropy for several  $B$ , as obtained from the respective  $C$  data. The solid lines are the calculated Schottky contributions to the total  $C$ , which are due to field splitting and are obtained as the sum on non-interacting spin centers. As can be seen, these contributions are largely exceeding the maximum values of the experimental magnetic  $C$ , denoting that the applied fields used are not sufficient to magnetically decouple the spin centers.
